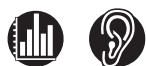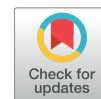

# Use of Factory-Calibrated Real-time Continuous Glucose Monitoring Improves Time in Target and HbA<sub>1c</sub> in a Multiethnic Cohort of Adolescents and Young Adults With Type 1 Diabetes: The MILLENNIALS Study

Diabetes Care 2020;43:2537–2543 | <https://doi.org/10.2337/dc20-0736>

Hood Thabit,<sup>1,2</sup> Joshi Navis Prabhu,<sup>1</sup> Womba Mubita,<sup>1</sup> Catherine Fullwood,<sup>3</sup> Shazli Azmi,<sup>1</sup> Andrea Urwin,<sup>1</sup> Ian Doughty,<sup>4</sup> and Lalantha Leelarathna<sup>1,2</sup>

## OBJECTIVE

International type 1 diabetes registries have shown that HbA<sub>1c</sub> levels are highest in young people with type 1 diabetes; however, improving their glycemic control remains a challenge. We propose that use of the factory-calibrated Dexcom G6 CGM system would improve glycemic control in this cohort.

## RESEARCH DESIGN AND METHODS

We conducted a randomized crossover trial in young people with type 1 diabetes (16–24 years old) comparing the Dexcom G6 CGM system and self-monitoring of blood glucose (SMBG). Participants were assigned to the interventions in random order during two 8-week study periods. During SMBG, blinded continuous glucose monitoring (CGM) was worn by each participant for 10 days at the start, week 4, and week 7 of the control period. HbA<sub>1c</sub> measurements were drawn after enrollment and before and after each treatment period. The primary outcome was time in range 70–180 mg/dL.

## RESULTS

Time in range was significantly higher during CGM compared with control ( $35.7 \pm 13.5\%$  vs.  $24.6 \pm 9.3\%$ ; mean difference  $11.1\%$  [95% CI 7.0–15.2];  $P < 0.001$ ). CGM use reduced mean sensor glucose ( $219.7 \pm 37.6$  mg/dL vs.  $251.9 \pm 36.3$  mg/dL; mean difference  $-32.2$  mg/dL [95% CI  $-44.5$  to  $-20.0$ ];  $P < 0.001$ ) and time above range ( $61.7 \pm 15.1\%$  vs.  $73.6 \pm 10.4\%$ ; mean difference  $11.9\%$  [95% CI  $-16.4$  to  $-7.4$ ];  $P < 0.001$ ). HbA<sub>1c</sub> level was reduced by 0.76% (95% CI  $-1.1$  to  $-0.4$ ) ( $-8.5$  mmol/mol [95% CI  $-12.4$  to  $-4.6$ ];  $P < 0.001$ ). Times spent below range ( $<70$  mg/dL and  $<54$  mg/dL) were low and comparable during both study periods. Sensor wear was 84% during the CGM period.

## CONCLUSIONS

CGM use in young people with type 1 diabetes improves time in target and HbA<sub>1c</sub> levels compared with SMBG.

<sup>1</sup>Manchester Diabetes Centre, Manchester Royal Infirmary, Manchester, U.K.

<sup>2</sup>Division of Diabetes, Endocrinology and Gastroenterology, Faculty of Biology, Medicine and Health, University of Manchester, Manchester, U.K.

<sup>3</sup>Research and Innovation, Manchester Royal Infirmary, Manchester, U.K.

<sup>4</sup>Royal Manchester Children's Hospital, Manchester Royal Infirmary, Manchester, U.K.

Corresponding author: Hood Thabit, hood.thabit@mft.nhs.uk

Received 4 April 2020 and accepted 29 June 2020  
Clinical trial reg. no. NCT03445377, clinicaltrials.gov

This article contains supplementary material online at <https://doi.org/10.2337/figshare.12616208>.

This article is featured in a podcast available at <https://www.diabetesjournals.org/content/diabetes-core-update-podcasts>.

© 2020 by the American Diabetes Association. Readers may use this article as long as the work is properly cited, the use is educational and not for profit, and the work is not altered. More information is available at <https://www.diabetesjournals.org/content/license>.

The goal of type 1 diabetes management is the attainment of optimal glycemic control to avoid acute and longer-term complications (1). Recent international type 1 diabetes registries have shown that HbA<sub>1c</sub> levels are highest in adolescents and young adults (2,3), with mean HbA<sub>1c</sub> levels in this cohort increasing from 2010–2012 to 2016–2018. Glycemic control earlier in life may have direct consequence on future diabetes-related comorbidities (4). This is compounded by the increasing duration of diabetes as this cohort becomes older. Emerging evidence also reports that during this challenging period of their lives, young people living with type 1 diabetes can experience significant psychosocial burden, which adversely impacts their psychological adjustment and diabetes management (5,6).

Real-time continuous glucose monitoring (RT-CGM) is associated with lower HbA<sub>1c</sub> levels, with benefits linked to user adherence of the technology (7–9). The improvement in glycemic control, however, appears to be attenuated in youths and adolescents compared with other age groups. The JDRF CGM study reported that only 30% of adolescents and young adults (15–24 years) were using CGM for  $\geq 6$  days/week, compared with 83% of adults ( $>25$  years old) (8). Recent reports also showed that actual rates of CGM use in clinical practice are lowest in adolescents and young adults, irrespective of reimbursement (9). There is therefore an unmet need to find innovative strategies to address the adoption of CGM and evaluate its efficacy in this vulnerable group. The advent of the Dexcom G6 factory-calibrated CGM system, which is linked to a smartphone application (app), appears promising and may provide a novel approach to the above need (10).

In this study, we present the results of the MILLENNIALS study (Real-tiMe Continuous glucosE moNitoriNg With Self-monitoring of Blood Glucose in Young Adults With Type 1 diabetes), an 8-week randomized controlled trial in adolescents and young adults aged 16–25 years with suboptimally controlled type 1 diabetes. We hypothesized that use of a factory-calibrated CGM system with smartphone app in this cohort would improve glycemic control compared with self-monitoring of blood glucose (SMBG).

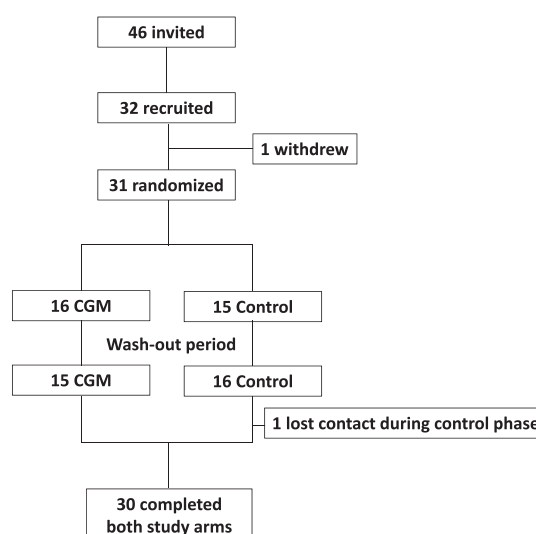

Figure 1—Flow of participants.

## RESEARCH DESIGN AND METHODS

### Study Design and Participants

The study had an open-label, randomized controlled crossover study design. All participants had type 1 diabetes as defined by the World Health Organization for at least 1 year and were either on multiple daily injections (MDI) or insulin pump therapy. We identified and recruited adolescents and young adult participants between 16 and 24 years of age attending Royal Manchester Children Hospital, Manchester Royal Infirmary Hospital (Manchester, U.K.) and Trafford General Hospital (Manchester, U.K.). Other inclusion and

exclusion criteria are provided in the Supplementary Appendix.

Recruited participants underwent a 2-week run-in period with a blinded CGM sensor to assess tolerance to wearing the sensor. All participants who successfully completed the run-in period were then randomly assigned to 8 weeks of CGM using the Dexcom G6 system during the intervention period and SMBG during the control period. Randomization (1:1 block) was performed by a centralized web-based program.

Participants installed the Dexcom G6 Mobile CGM app in their own personal

Table 1—Characteristics of the study participants at baseline

| Characteristics                                    |                                 |
|----------------------------------------------------|---------------------------------|
| Sex, N                                             |                                 |
| Female                                             | 18 (58.1)                       |
| Male                                               | 13 (41.9)                       |
| Age (years)                                        | 21.2 $\pm$ 2.3                  |
| Age range 16–20 years                              | 14 (45)                         |
| Age range 21–24 years                              | 17 (55)                         |
| BMI (kg/m <sup>2</sup> )                           | 25.5 $\pm$ 4.6                  |
| Duration of diabetes (years), median (IQR)         | 12.9 (9.0–16.4)                 |
| Insulin delivery method                            |                                 |
| MDI                                                | 14 (45.2)                       |
| Insulin pump therapy                               | 17 (54.8)                       |
| HbA <sub>1c</sub> at screening, % (mmol/mol)       | 9.3 $\pm$ 1.3 (78.4 $\pm$ 14.4) |
| Ethnicity                                          |                                 |
| White                                              | 20 (64.5)                       |
| Black British/African/Caribbean                    | 6 (19.4)                        |
| Asian British/Asian                                | 2 (6.5)                         |
| Mixed/multiple ethnic groups                       | 3 (9.7)                         |
| Index of Multiple Deprivation rank, median (IQR)   | 7,261 (2,354–13,804)            |
| Index of Multiple Deprivation decile, median (IQR) | 3.0 (1.0–5.0)                   |

Data are N (%) or mean  $\pm$  SD unless otherwise indicated.

**Table 2—Glycemic outcomes for the whole study period and sensor wear**

| Day and night                       | CGM ( <i>n</i> = 30) | Control ( <i>n</i> = 30) | Paired mean difference (95% CI)* | <i>P</i> value |
|-------------------------------------|----------------------|--------------------------|----------------------------------|----------------|
| Time spent at glucose level (%)     |                      |                          |                                  |                |
| 70–180 mg/dL                        | 35.7 ± 13.5          | 24.6 ± 9.3               | 11.1 (7.0, 15.2)                 | <0.001         |
| >180 mg/dL                          | 61.7 ± 15.1          | 73.6 ± 10.4              | −11.9 (−16.4, −7.4)              | <0.001         |
| >300 mg/dL                          | 21.7 ± 14.4          | 33.4 ± 16.5              | −11.7 (−16.8, −6.6)              | <0.001         |
| <70 mg/dL                           | 1.45 (0.40–4.08)     | 0.58 (0.20–3.50)         |                                  | 0.055          |
| <63 mg/dL                           | 0.65 (0.18–2.32)     | 0.25 (0.04–2.15)         |                                  | 0.111          |
| <54 mg/dL                           | 0.28 (0.05–1.16)     | 0.06 (0.00–0.99)         |                                  | 0.102          |
| HbA <sub>1c</sub> change (%)        | −0.53 ± 0.74         | 0.24 ± 0.69              | −0.76 (−1.1, −0.4)               | <0.001         |
| HbA <sub>1c</sub> change (mmol/mol) | −5.9 ± 8.0           | 2.6 ± 7.5                | −8.5 (−12.4, −4.6)               | <0.001         |
| Mean glucose (mg/dL)                | 219.7 ± 37.6         | 251.9 ± 36.3             | −32.2 (−44.5, −20.0)             | <0.001         |
| SD of glucose (mg/dL)               | 85.3 ± 14.1          | 90.0 ± 11.3              | −4.6 (−9.0, −0.3)                | 0.037          |
| CV of glucose (%)                   | 39.3 ± 5.6           | 36.3 ± 6.3               | 3.0 (1.0, 4.9)                   | 0.006          |

Data are mean ± SD or median (IQR). CV, coefficient of variation. \*Normally distributed data are presented as mean differences of values (CGM minus control phase). A positive value indicates that the measurement was higher during the CGM period than it was during the control period.

smartphone and were given a Dexcom G6 receiver as backup. Prior to CGM use, participants were trained and educated on CGM application and decision-making using the manufacturer's printed training guide. Competency on each participant's decision-making capability using CGM data was assessed at the end of the CGM training period. Participants performed fingerstick capillary glucose measurements as per usual clinical practice during the 8-week SMBG control period. During the control period, a blinded CGM (glucose values not displayed to participant) was worn by each participant for 10 days at the start, week 4, and week 7 of the control period. The two treatment periods were separated by a 3- to 4-week washout, during which they continued with their standard method of capillary glucose monitoring.

### Outcomes

The primary end point in the study was the proportion of time that the sensor glucose level as measured by the CGM device was in the target range of 3.9–10 mmol/L during the 8-week study period. Secondary end points were the glycated hemoglobin level, mean sensor glucose levels, and the time spent below and above the relevant glucose ranges during day and night (daytime [0800–2300 h] and overnight [2300–0800 h]).

### Data Collection

Participants had identical planned contact with the study team during the two treatment periods. CGM data pertaining to primary and secondary end points were collected and exported for analysis using

the manufacturer's designated web-based Dexcom CLARITY software. Blood samples for HbA<sub>1c</sub> measurements were drawn after enrollment and before and after each treatment period. HbA<sub>1c</sub> analysis was performed at a central laboratory. Information pertaining to usability and psychosocial impact of using CGM in this age group was collected using validated questionnaires, which were given to participants at recruitment and end of the second treatment period. Other end points collected were the number of self-measurements of blood glucose and rate of severe hypoglycemia, defined as unconsciousness from hypoglycemia or requiring assistance from another person. Participants were assigned an English Index of Deprivation rank (<https://www.gov.uk/government/statistics/english-indices-of-deprivation-2019>) based upon their postcode. These were then grouped by deprivation decile defined by their position in the ranks from the 32,844 small areas in England subdivided into 10 equal groups, with 1 being the most socioeconomically deprived and 10 being the least deprived.

### Sample Size

The power calculation was based on improvements in time in target. Assuming an SD of 18% and average improvement of time in target of 10%, 30 subjects are required at the desired 80% power and an  $\alpha$  level of 0.05 (two-tailed). Up to 40 subjects were planned to be recruited, aiming for 30 completed subjects to allow for dropouts. Subjects who dropped out of the study during run-in period and within the first 2 weeks of the first intervention were allowed to be replaced.

### Ethics and Support Sources

The study protocol was approved by an independent research ethics committee (REC reference: 18/NW/0183). All participants provided written informed consent. Dexcom, Inc. provided funding and supplied the CGM devices and sensors used in the study. Dexcom, Inc. read the manuscript before submission. No sponsor had any role in the study design, data collection, data analysis, data interpretation, or writing of the report. The corresponding author had full access to all study data and had final responsibility for the decision to submit the publication.

### Statistical Analysis

Statistical analyses were performed on an intention-to-treat basis. Any period effect resulting from the intervention and control periods was investigated using univariate ANOVA adjusted for period and subject. As no period effect was found, paired-sample *t* tests and Wilcoxon signed-rank tests were performed for normal and nonnormal variables, respectively. Values were presented as mean ± SD or median (interquartile range [IQR]). The hypothesis testing was ordered first to consider the primary end point at the 0.05 level and then to move to testing the secondary end points individually at the 0.05 level without any control for multiplicity. We did the analyses with SPSS (version 25; IBM Software, Hampshire, U.K.). All *P* values are two-sided.

## RESULTS

### Participants

Forty-six potential participants were invited to the study. Fourteen did not reply

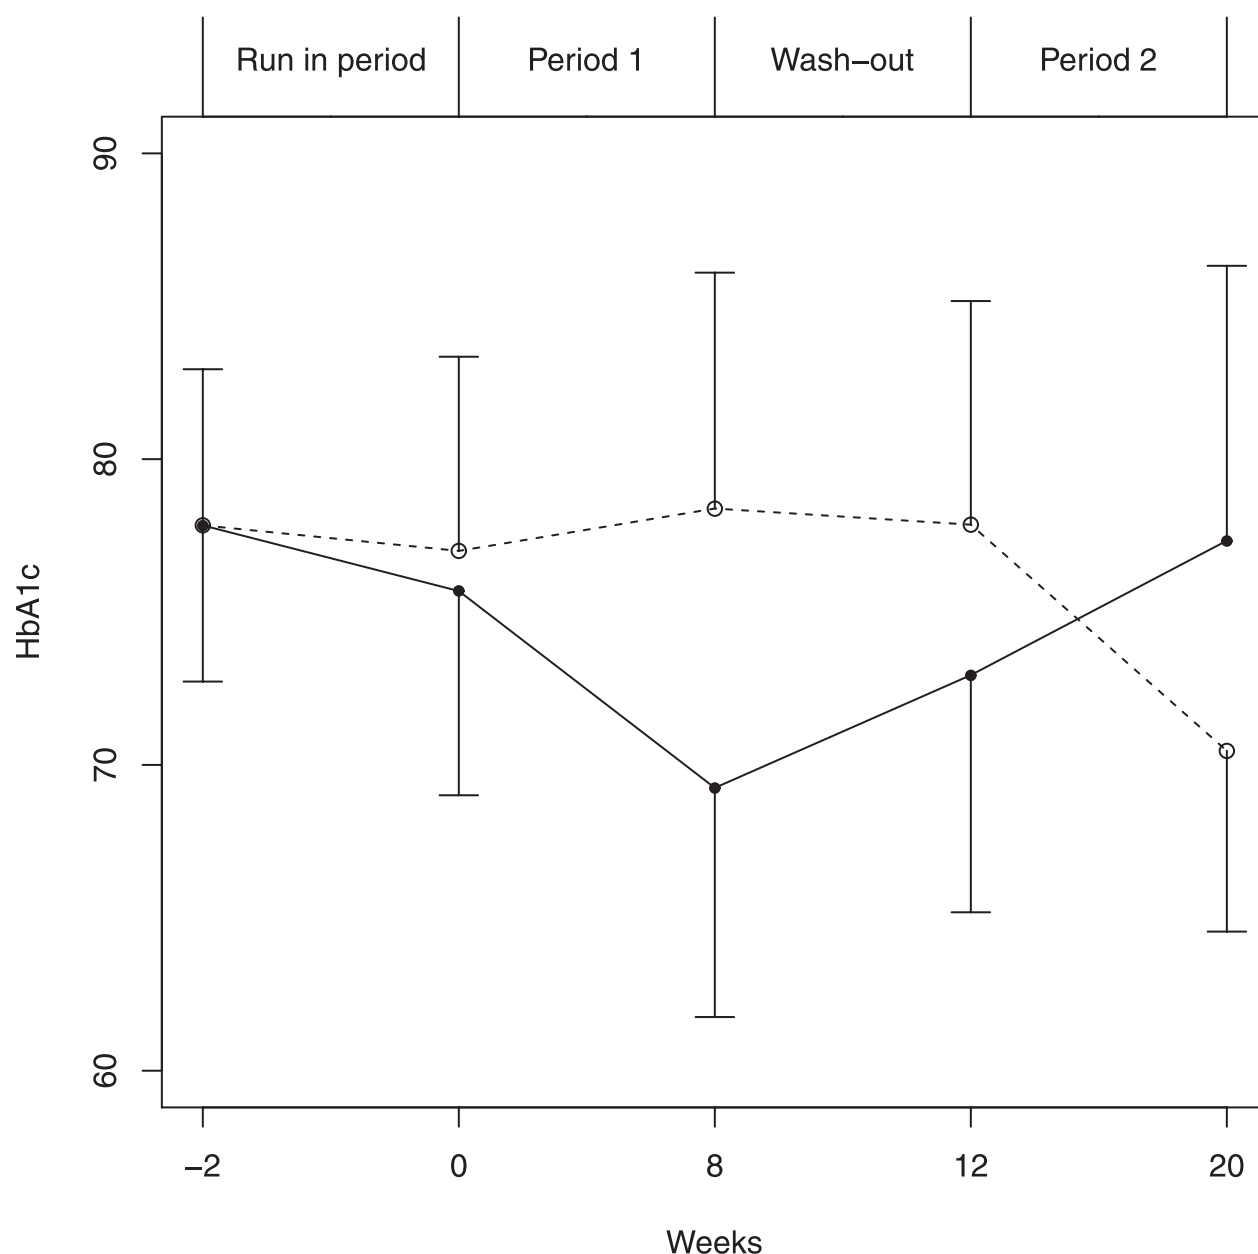

**Figure 2**—HbA<sub>1c</sub> changes during study period. Solid line indicates CGM first, followed by control intervention; dashed line indicates control first, followed by CGM intervention.

or were unable to participate due to other commitments. Thirty-two participants were recruited from September 2018 to July 2019. Figure 1 shows the flow of participants through the study. One participant withdrew during the run-in period before being randomized due to work commitments. Another participant was uncontactable during the control period; however, the participant returned for the final visit, and an HbA<sub>1c</sub> sample was taken.

Table 1 summarizes baseline characteristics of randomized participants. HbA<sub>1c</sub> at screening was  $9.3 \pm 1.3\%$  ( $78.4 \pm$

$14.4$  mmol/mol). The numbers of participants on MDI or insulin pump therapy were comparable. Sixty-five percent self-identified as White British, and 58% lived in areas of relatively high deprivation (the most deprived 30% of small areas in England).

### Study Primary and Secondary End Points

#### Twenty-Four-Hour Period

Overall 24-h glucose control over 8 weeks during the CGM and control periods is shown in Table 2. The primary end point of the study, the proportion of time during the 24-h period when sensor glucose was

in target range from 70 to 180 mg/dL, was significantly increased by 11.1 percentage points (95% CI 7.0–15.2%;  $P < 0.001$ ) during the CGM period. CGM use reduced mean sensor glucose by 32.2 mg/dL (95% CI –44.5 to –20.0 mg/dL;  $P < 0.001$ ) and time spent above target by 11.9 percentage points (95% CI –16.4 to –7.4%;  $P < 0.001$ ). The proportion of time sensor glucose level in the hypoglycemia range was relatively low and comparable during both study periods.

#### HbA<sub>1c</sub> Change

HbA<sub>1c</sub> level reduced by  $0.53 \pm 0.74\%$  ( $5.9 \pm 8.0$  mmol/mol) during the CGM

**Table 3—Glycemic outcomes during nighttime and daytime periods**

|                                     | CGM              | Control          | Paired mean difference (95% CI)* | P value |
|-------------------------------------|------------------|------------------|----------------------------------|---------|
| <b>Nighttime only (2300–0800 h)</b> |                  |                  |                                  |         |
| Mean glucose (mg/dL)                | 218.7 ± 37.3     | 251.7 ± 41.8     | −33.0 (−46.4, −19.6)             | <0.001  |
| Time spent at glucose level (%)     |                  |                  |                                  |         |
| 70–180 mg/dL                        | 34.9 ± 13.8      | 25.3 ± 11.9      | 9.7 (4.7, 14.7)                  | <0.001  |
| 70–144 mg/dL                        | 22.7 ± 10.4      | 13.6 ± 7.4       | 9.1 (5.7, 12.5)                  | <0.001  |
| >180 mg/dL                          | 62.4 ± 15.5      | 73.0 ± 12.8      | −10.5 (−15.9, −5.1)              | <0.001  |
| >144 mg/dL                          | 74.6 ± 12.4      | 84.6 ± 9.1       | −10.0 (−13.9, −6.1)              | <0.001  |
| <70 mg/dL                           | 1.06 (0.51–4.03) | 0.73 (0.05–3.56) |                                  | 0.055   |
| <50 mg/dL                           | 0.10 (0.00–0.63) | 0.00 (0.00–0.44) |                                  | 0.117   |
| <b>Daytime only (0800–2300 h)</b>   |                  |                  |                                  |         |
| Mean glucose (mg/dL)                | 218.3 ± 39.5     | 249.4 ± 40.8     | −31.1 (−42.4, −19.7)             | <0.001  |
| Time spent at glucose level (%)     |                  |                  |                                  |         |
| 70–180 mg/dL                        | 36.8 ± 13.9      | 25.5 ± 10.9      | 11.3 (7.2, 15.4)                 | <0.001  |
| >180 mg/dL                          | 60.3 ± 15.5      | 72.3 ± 12.5      | −12.0 (−16.7, −7.3)              | <0.001  |
| <70 mg/dL                           | 2.03 (0.53–4.05) | 0.94 (0.22–3.50) |                                  | 0.179   |
| <50 mg/dL                           | 0.27 (0.00–0.99) | 0.02 (0.00–0.77) |                                  | 0.408   |

Data are mean ± SD or median (IQR). \*Normally distributed data are presented as mean differences of values (CGM minus control phase). A positive value indicates that the measurement was higher during the CGM period than it was during the control period.

period and increased by  $0.24 \pm 0.69\%$  ( $2.6 \pm 7.5$  mmol/L) during the control period (mean difference CGM vs. control;  $-0.76\%$  [95% CI  $-1.1$  to  $-0.4$ ] [ $-8.5$  mmol/mol (95% CI  $-12.4$  to  $-4.6$ );  $P < 0.001$ ]). HbA<sub>1c</sub> was lower in participants on CGM during the first and second treatment periods (Fig. 2).

#### Nighttime and Daytime Period

Overnight and daytime glycemic end points are shown in Table 3. The proportion of time that the glucose level was within the overnight target range was significantly increased by 9.1 percentage points (95% CI 5.7–12.5;  $P < 0.001$ ) with CGM, and this was associated with reduced time spent above the overnight target range and mean sensor glucose level. The proportions of time spent in hypoglycemia were relatively low and comparable during both CGM and control periods.

Compared with the control period, CGM significantly increased the proportion of time that the glucose level was within daytime target range by 11.3 percentage points (95% CI 7.2–15.4;  $P < 0.001$ ). Similarly, time spent above daytime target range and mean sensor glucose level were significantly reduced by CGM. The proportions of time spent in hypoglycemia during daytime were comparable between the CGM and control periods.

#### Treatment Adherence and User Feedback

Overall median time and IQR of CGM use, estimated by the proportion of CGM data downloaded in relation to follow-up time, was 84.0% (62.6–94.0). Compared with the control arm, participants using RT-CGM

had significantly higher total mean score on the Glucose Monitoring Satisfaction Survey ( $4.0 \pm 0.6$  vs.  $3.5 \pm 0.6$ ;  $P = 0.011$ ), indicating greater satisfaction with RT-CGM. Participants on RT-CGM reported greater openness (“Openness” item mean score  $3.6 \pm 0.9$  vs.  $2.9 \pm 0.9$ ;  $P = 0.003$ ) and reduced burden (“Behavioral Burden” item mean score  $1.8 \pm 0.7$  vs.  $2.4 \pm 0.9$ ;  $P = 0.007$ ). The mean score for the Glucose Monitoring Satisfaction Survey items “Emotional Burden” and “Trust” was comparable for the RT-CGM and control arms. There was no significant difference in total Diabetes Distress Scale score between both groups.

#### SMBG

Patients performed an average of  $2.8 \pm 1.4$  self-measurements of blood glucose during CGM therapy and  $3.7 \pm 2.3$  during conventional therapy.

#### Adverse Events

Details of all of the adverse events are provided in Table 4. No episodes of severe hypoglycemia or diabetes ketoacidosis

occurred in either study period. One episode of diabetes ketoacidosis occurred during the washout period due to an intercurrent illness.

## CONCLUSIONS

Our findings show that in this randomized controlled trial, use of CGM in a multiethnic cohort of adolescents and young adults with type 1 diabetes led to a significant increase in the proportion of time that the glucose level was in the target range compared with SMBG. This was accompanied by significant reduction in HbA<sub>1c</sub> level, mean glucose, and time spent in hyperglycemia. The benefits in glycemic outcome over the whole 24-h period were also seen separately during overnight and daytime periods.

Data from international registries have consistently reported higher HbA<sub>1c</sub> levels among adolescents and young adults with type 1 diabetes compared with preadolescents and older adults (2,3,11). Challenges faced by this age group in

**Table 4—Adverse events**

| Events                                              | RT-CGM period | Control period | Washout period |
|-----------------------------------------------------|---------------|----------------|----------------|
| Gastroenteritis                                     | 1             | 2              | 0              |
| Respiratory tract infection                         | 0             | 2              | 0              |
| Urinary tract infection                             | 0             | 1              | 0              |
| Ketonemia related to missed basal insulin injection | 1             | 0              | 0              |
| Fractured foot                                      | 1             | 0              | 0              |
| Diabetes ketoacidosis due to intercurrent illness   | 0             | 0              | 1              |

achieving their glycemic targets include lower engagement levels of diabetes self-management and the psychological burden of living with the condition during this developmental phase of their lives (12,13). Although previous randomized studies have shown clinically meaningful HbA<sub>1c</sub> reduction during CGM use compared with SMBG (7,14,15), the majority of these studies were performed in adults, with relatively few randomized studies in adolescents and young adults. Observational nonrandomized studies showed that CGM use in adolescents with type 1 diabetes facilitated HbA<sub>1c</sub> improvement (2,16), while a meta-analysis showed no difference in HbA<sub>1c</sub> levels between CGM and SMBG in this cohort (17). These results, however, are limited by the inherent risk of bias in the former and the heterogeneity between studies in the latter.

To our knowledge, this is the first randomized clinical study of a factory-calibrated CGM system in this age group. The reduced daily burden of using factory-calibrated CGM, which is clinically approved for nonadjunctive use as part of diabetes management (18), may have been a contributory factor associated with the greater satisfaction and openness reported in this study, as well as reduced daily hassle associated with the device. The smartphone app use may have also facilitated the CGM use adherence observed in our study (median use 84% compared with 30% in the JDRF CGM study in adolescence) by reducing the need to carry additional devices. Device burden is known to be associated with discontinuation of CGM use in this cohort (19). We therefore speculate that these factors may have attributed to the relatively higher percentage of CGM sensor use in our study compared with others. In JDRF CGM study, although higher sensor use adherence was associated with greater HbA<sub>1c</sub> reduction (20), sensor use and HbA<sub>1c</sub> reduction were significantly lower among adolescents compared with adults (8). Certain caveats, however, need to be considered when comparing our findings with older CGM studies, as reported outcomes are also likely influenced by recent improvements in CGM system technology, such as sensor accuracy and usability.

The current work extends findings from adult studies using a similar Dexcom G6 CGM system, which showed improvement in glycemic control compared with SMBG

among MDI (7,14) and pump users (15). Participants in our study were provided with individualized training and approved educational materials to help optimize their use of the CGM system. Long-term adherence to health care professional and educator advice, however, in this specific age group is known to be lower compared with the older group and may have influenced the moderate improvement of time in target observed in our study. Although the time in target achieved by CGM in our study was relatively low compared with that reported by others, the reduction in HbA<sub>1c</sub> achieved is nevertheless clinically meaningful in this young population in the reduction of the risk of future complications. There was a trend of numerically increased hypoglycemia rates during CGM use, which did not reach statistical significance. However, in the context of the relatively low hypoglycemia rates during the control period at the expense of hyperglycemia (time spent <70 mg/dL of 9 min/day during control period and 20 min/day during CGM period) this is not unexpected and comparable to the Continuous Glucose Monitoring Treatment in Patients With Type 1 Diabetes Treated With Insulin Injections (GOLD) study in adults with type 1 diabetes (mean  $\pm$  SD 2.79  $\pm$  2.97%). We also noted slight increase in glucose variability in our study. This is likely explained by participants correcting high glucose levels in the CGM period compared with persistent underrecognized and therefore uncorrected high glucose levels in the control period.

The strengths of our study are the randomized crossover design; confounding study period effect was not detected for the primary end point. Compared with other published type 1 diabetes and technology studies, ours included a higher proportion of participants from diverse ethnic backgrounds, who tend to be underrepresented in type 1 diabetes research and practice (21). Over half of our participants also live in areas constituting the 30% most deprived areas of England. Our study thus allows for greater generalizability, especially among inner-city inhabitants with type 1 diabetes. We included both MDI and pump users, in keeping with current use of CGM in both treatment modalities. High adherence to glucose sensor wear during the CGM period was observed, likely due to reduced device burden. The study was limited by the relatively short duration,

restricting longer-term assessment. The sample size of the study limits the statistical power to perform subgroup analysis (i.e., glycemic outcomes among MDI/pump users and ethnicity). The amount of sensor data available for analysis was not equal between the CGM and control periods; however, the HbA<sub>1c</sub> level improvement supports the glycemic benefit of CGM use in this population.

In conclusion, we found that use of a factory-calibrated Dexcom G6 CGM system in adolescents and young adults with type 1 diabetes over an 8-week period led to an increase in proportion of time spent in target range and reduced time spent in hyperglycemia, accompanied by meaningful HbA<sub>1c</sub> reduction. This was associated with greater satisfaction in glucose monitoring, further extending its benefit within this population.

**Acknowledgments.** The authors thank the study volunteers for participation in the studies and acknowledge support by the staff at Manchester Diabetes Centre and Royal Manchester Children's Hospital (Manchester, U.K.).

**Funding.** Dexcom, Inc. supplied the CGM devices and sensors used in the study.

Dexcom, Inc. read the manuscript before submission. No sponsor had any role in the study design, data collection, data analysis, data interpretation, or writing of the report.

**Quality of Interest.** Dexcom, Inc. provided funding for this study. H.T. has received research support from Dexcom, Inc. S.A. received honoraria for educational speaker meetings from Novo Nordisk, AstraZeneca, Boehringer Ingelheim/Eli Lilly and Company, Napp Pharmaceuticals, and Sanofi. L.L. has received speaker honoraria from Animas, Abbott, Insulet, Medtronic, Novo Nordisk, Roche, and Sanofi; served on advisory panels for Animas, Abbott, Novo Nordisk, Dexcom, Inc., Medtronic, Sanofi, and Roche; and received research support from Novo Nordisk and Dexcom, Inc. No other potential conflicts of interest relevant to this article were reported.

**Author Contributions.** H.T. and L.L. designed the study. H.T., J.N.P., W.M., S.A., I.D., and L.L. screened and enrolled participants and arranged informed consent from the participants. H.T., J.N.P., W.M., A.U., and L.L. provided patient care and took samples. H.T. managed randomization. H.T., C.F., and L.L. did or supported data analyses, including the statistical analyses. H.T., C.F., and L.L. interpreted the results. H.T. wrote the manuscript. All authors critically reviewed the report. No writing assistance was provided. H.T. and L.L. are the guarantors of this work and, as such, had full access to all of the data in the study and take responsibility for the integrity of the data and the accuracy of the data analysis.

**Prior Presentation.** Parts of this work were presented in poster form at the 80th Scientific Sessions of the American Diabetes Association, 12–16 June 2020.

## References

- DiMeglio LA, Evans-Molina C, Oram RA. Type 1 diabetes. *Lancet* 2018;391:2449–2462
- Foster NC, Beck RW, Miller KM, et al. State of type 1 diabetes management and outcomes from the T1D Exchange in 2016–2018. *Diabetes Technol Ther* 2019;21:66–72
- Schwandt A, Hermann JM, Rosenbauer J, et al.; DPV Initiative. Longitudinal trajectories of metabolic control from childhood to young adulthood in type 1 diabetes from a large German/Austrian registry: a group-based modeling approach. *Diabetes Care* 2017;40:309–316
- Reddy MA, Zhang E, Natarajan R. Epigenetic mechanisms in diabetic complications and metabolic memory. *Diabetologia* 2015;58:443–455
- van Duinkerken E, Snoek FJ, de Wit M. The cognitive and psychological effects of living with type 1 diabetes: a narrative review. *Diabet Med* 2020;37:555–563
- Verschueren M, Oris L, Claes L, Moons P, Weets I, Luyckx K. Identity formation in adolescents and emerging adults with type 1 diabetes. *Psychol Health Med* 2020;25:519–529
- Lind M, Polonsky W, Hirsch IB, et al. Continuous glucose monitoring vs conventional therapy for glycemic control in adults with type 1 diabetes treated with multiple daily insulin injections: the GOLD randomized clinical trial. *JAMA* 2017;317:379–387
- Juvenile Diabetes Research Foundation Continuous Glucose Monitoring Study Group. Effectiveness of continuous glucose monitoring in a clinical care environment: evidence from the Juvenile Diabetes Research Foundation continuous glucose monitoring (JDRF-CGM) trial. *Diabetes Care* 2010;33:17–22
- DeSalvo DJ, Miller KM, Hermann JM, et al.; T1D Exchange and DPV Registries. Continuous glucose monitoring and glycemic control among youth with type 1 diabetes: international comparison from the T1D Exchange and DPV Initiative. *Pediatr Diabetes* 2018;19:1271–1275
- Wadwa RP, Laffel LM, Shah VN, Garg SK. Accuracy of a factory-calibrated, real-time continuous glucose monitoring system during 10 days of use in youth and adults with diabetes. *Diabetes Technol Ther* 2018;20:395–402
- National Health Service. National Diabetes Transition Audit 2003–2014, 2017. Accessed 29 November 2017. Available from <https://www.digital.nhs.uk/catalogue/PUB30008>
- Abdoli S, Hardy LR, Hall J. The complexities of “struggling to live life”. *Diabetes Educ* 2017;43:206–215
- Holt RIG. The burden of diabetes self-management in children and young adults. *Diabet Med* 2017;34:747
- Beck RW, Riddlesworth T, Ruedy K, et al.; DIAMOND Study Group. Effect of continuous glucose monitoring on glycemic control in adults with type 1 diabetes using insulin injections: the DIAMOND randomized clinical trial. *JAMA* 2017;317:371–378
- Beck RW, Riddlesworth TD, Ruedy KJ, et al.; DIAMOND Study Group. Effect of initiating use of an insulin pump in adults with type 1 diabetes using multiple daily insulin injections and continuous glucose monitoring (DIAMOND): a multicentre, randomised controlled trial. *Lancet Diabetes Endocrinol* 2017;5:700–708
- Vesco AT, Jedraszko AM, Garza KP, Weissberg-Benchell J. Continuous glucose monitoring associated with less diabetes-specific emotional distress and lower A1c among adolescents with type 1 diabetes. *J Diabetes Sci Technol* 2018;12:792–799
- Langendam M, Luijck YM, Hooft L, Devries JH, Mudde AH, Scholten RJ. Continuous glucose monitoring systems for type 1 diabetes mellitus. *Cochrane Database Syst Rev* 2012;1:CD008101
- U.S. Food and Drug Administration. FDA News Release: FDA authorizes first fully interoperable continuous glucose monitoring system, streamlines review pathway for similar devices, 2018. Accessed 17 January 2020. Available from <https://www.fda.gov/news-events/press-announcements/fda-authorizes-first-fully-interoperable-continuous-glucose-monitoring-system-streamlines-review>
- Giani E, Snelgrove R, Volkening LK, Laffel LM. Continuous glucose monitoring (CGM) adherence in youth with type 1 diabetes: associations with biomedical and psychosocial variables. *J Diabetes Sci Technol* 2017;11:476–483
- Chase HP, Beck RW, Xing D, et al. Continuous glucose monitoring in youth with type 1 diabetes: 12-month follow-up of the Juvenile Diabetes Research Foundation continuous glucose monitoring randomized trial. *Diabetes Technol Ther* 2010;12:507–515
- Valenzuela JM, Records SE, Mueller KA, Martin MT, Wolf RM. Racial ethnic disparities in youth with type 1 diabetes participating in diabetes summer camps. *Diabetes Care* 2020;43:903–905
